# Supplementary material
Source: PubMed Central journal article supplement (PMC5896762)
Supplement: NIHMS907694-supplement-Supp_FigS1.pdf [file NIHMS907694-supplement-Supp_FigS1.pdf]

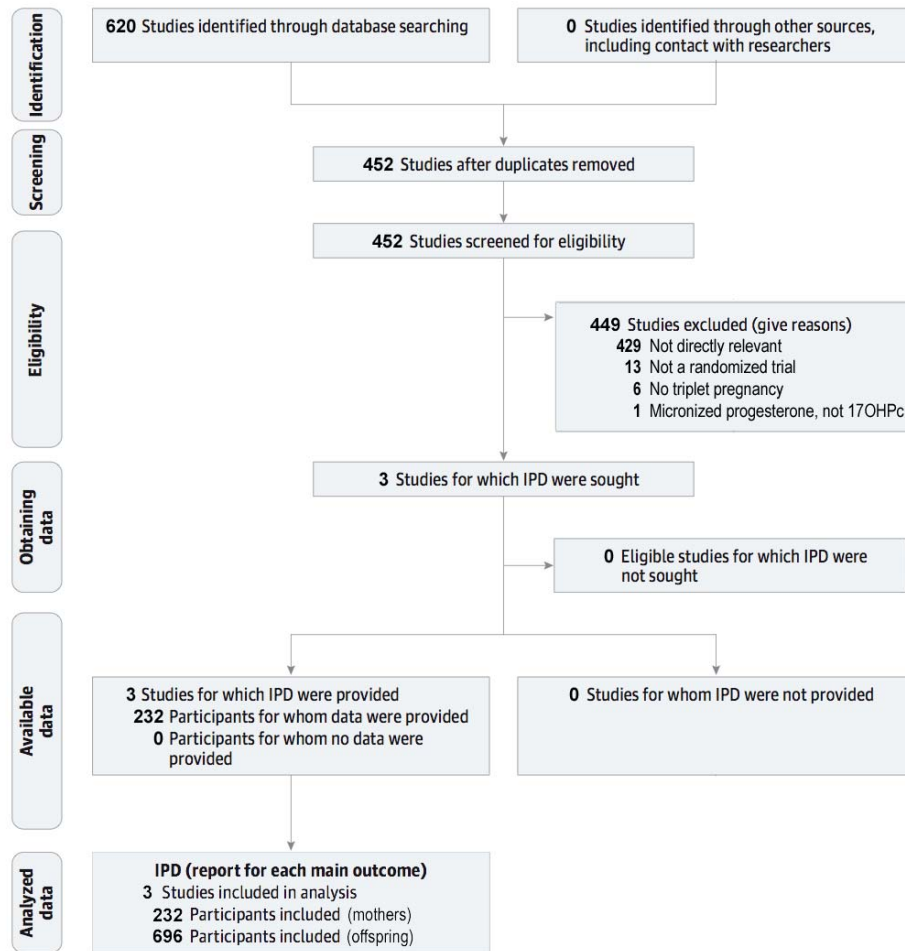

Figure S1. Flow diagram of study identification and selection.  
(17OHPc = 17-hydroxyprogesterone caproate)
