# Supplementary material
Source: PubMed Central journal article supplement (PMC5896762)
Supplement: NIHMS907694-supplement-Supp_FigS2.pdf [file NIHMS907694-supplement-Supp_FigS2.pdf]

|                 | Random sequence generation (selection bias) | Allocation concealment (selection bias) | Blinding of participants and personnel (performance bias) | Blinding of outcome assessment (detection bias) | Incomplete outcome data (attrition bias) | Selective reporting (reporting bias) | Other bias |
|-----------------|---------------------------------------------|-----------------------------------------|-----------------------------------------------------------|-------------------------------------------------|------------------------------------------|--------------------------------------|------------|
| NICHD-MFMU 2009 | +                                           | +                                       | +                                                         | +                                               | +                                        | +                                    | +          |
| Obstetrix 2010  | +                                           | +                                       | +                                                         | +                                               | +                                        | +                                    | +          |
| AMPHIA 2011     | +                                           | +                                       | +                                                         | +                                               | +                                        | +                                    | +          |

  

|                                                                                                      |                                                                                                          |                                                                                                       |
|------------------------------------------------------------------------------------------------------|----------------------------------------------------------------------------------------------------------|-------------------------------------------------------------------------------------------------------|
|  Low risk of bias |  Unclear risk of bias |  High risk of bias |
|------------------------------------------------------------------------------------------------------|----------------------------------------------------------------------------------------------------------|-------------------------------------------------------------------------------------------------------|

**Figure S2.** Quality summary: Risk of bias for each included study
