# Supplementary material
Source: PubMed Central journal article supplement (PMC5896762)
Supplement: NIHMS907694-supplement-Supp_TableS1.pdf [file NIHMS907694-supplement-Supp_TableS1.pdf]

**Table S1.** Overview of clinical trials testing prophylactic progestogens in triplet pregnancy

| Study                    | Type of Study                                        | N                | Inclusion criteria                                                                   | Progestogen                                 | Ratio <sup>a</sup> |
|--------------------------|------------------------------------------------------|------------------|--------------------------------------------------------------------------------------|---------------------------------------------|--------------------|
| NICHD-MFMU <sup>30</sup> | RCT, placebo-controlled, double-blind, multicenter   | 134              | Triamniotic triplet pregnancy, 16-20 weeks, no serious fetal anomaly                 | 17OHPc IM, 250 mg weekly.                   | 1:1                |
| Obstetrix <sup>31</sup>  | RCT, placebo-controlled, double-blind, multicenter   | 81               | Trichorionic triplet pregnancy, 16-24 weeks, no major fetal anomaly                  | 17OHPc IM, 250 mg weekly                    | 2:1                |
| AMPHIA <sup>33</sup>     | RCT, placebo-controlled, double-blind, multicenter   | 17 <sup>b</sup>  | Triplet pregnancy, 15-19 weeks, no prior preterm birth, no serious congenital defect | 17OHPc IM, 250 mg weekly                    | 1:1                |
| Wood <sup>34</sup>       | RCT, placebo-controlled, double-blind, single center | 3 <sup>b,c</sup> | Triamniotic triplet pregnancy, 16-21 wks, no major fetal anomaly                     | Progesterone gel, intravaginal, 90 mg daily | 1:1                |

<sup>a</sup> Ratio of randomized allocation to 17OHPc-to-placebo per protocol

<sup>b</sup> N is the number of triplet pregnancies in trials that also included twin pregnancies

<sup>c</sup> This study was excluded from the present metaanalysis

RCT = randomized clinical trial.

17OHPc = 17 hydroxyprogesterone caproate

IM = intramuscular

NICHD-MFMU = Eunice Kennedy Shriver National Institute of Child Health and Human Development, Maternal-Fetal Medicine Units Network

AMPHIA = 17-Alpha hydroxyprogesterone caproate in Multiple pregnancies to Prevent Handicapped Infants
