# Supplementary material
Source: PubMed Central journal article supplement (PMC5896762)
Supplement: NIHMS907694-supplement-Supp_TableS2.pdf [file NIHMS907694-supplement-Supp_TableS2.pdf]

**Table S2.** Rates of composite adverse perinatal outcome in various subgroups

|                                                  | Rate of Composite<br>Adverse Perinatal Outcome |             | P-value<br>of the<br>interaction |
|--------------------------------------------------|------------------------------------------------|-------------|----------------------------------|
|                                                  | 17-hydroxy-<br>progesterone<br>caproate        | Placebo     |                                  |
| Cervical length at $\leq 26$ weeks               |                                                |             | 0.71                             |
| $< 30^{\text{th}}$ percentile ( $< 31$ mm)       | 14/39 (36)                                     | 14/33 (42)  |                                  |
| $\geq 30^{\text{th}}$ percentile ( $\geq 31$ mm) | 33/126 (26)                                    | 23/60 (38)  |                                  |
| Cervical length at $\leq 26$ weeks <sup>a</sup>  |                                                |             | 0.09                             |
| $\leq 25$ mm                                     | 11/23 (48)                                     | 12/27 (44)  |                                  |
| $> 25$ mm                                        | 36/141 (26)                                    | 25/66 (38)  |                                  |
| Prior spontaneous preterm birth                  |                                                |             | 0.86 <sup>b</sup>                |
| Yes                                              | 13/30 (43)                                     | 15/36 (42)  |                                  |
| No                                               | 127/378 (34)                                   | 86/252 (34) |                                  |
| Maternal Body Mass Index                         |                                                |             | 0.60                             |
| $< 25$ kg/m <sup>2</sup>                         | 68/231 (29)                                    | 40/135 (30) |                                  |
| $\geq 25$ kg/m <sup>2</sup>                      | 66/153 (43)                                    | 59/144 (41) |                                  |
| Maternal Race                                    |                                                |             | 0.19 <sup>c</sup>                |
| Caucasian                                        | 97/306 (32)                                    | 81/234 (35) |                                  |
| Other                                            | 43/102 (42)                                    | 20/54 (37)  |                                  |
| Chorionicity <sup>a</sup>                        |                                                |             | 0.12 <sup>c</sup>                |
| Trichorionic                                     | 105/336 (31)                                   | 83/228 (36) |                                  |
| Dichorionic                                      | 14/36 (39)                                     | 11/27 (41)  |                                  |
| Monochorionic                                    | 16/21 (76)                                     | 0/0         |                                  |
| Assisted Reproduction Techniques <sup>a</sup>    |                                                |             | 0.15                             |
| Yes                                              | 99/320 (61)                                    | 70/207 (34) |                                  |
| No                                               | 38/84 (45)                                     | 28/75 (37)  |                                  |

Data expressed as n/N (%)

<sup>a</sup> These subgroup analyses were added after the protocol was finalized<sup>b</sup> Generalized estimating equations without random components<sup>c</sup> Random slope removed from model due to low numbers
